# Supplementary material
Source: PubMed Central journal article supplement (PMC6681451)
Supplement: NIHMS1529562-supplement-1.pdf [file NIHMS1529562-supplement-1.pdf]

**Cell Host & Microbe, Volume 25**

**Supplemental Information**

**IFI16 Targets the Transcription Factor Sp1  
to Suppress HIV-1 Transcription  
and Latency Reactivation**

**Dominik Hotter, Matteo Bosso, Kasper L. Jønsson, Christian Krapp, Christina M. Stürzel, Atze Das, Elisabeth Littwitz-Salomon, Ben Berkhout, Alina Russ, Sabine Wittmann, Thomas Gramberg, Yue Zheng, Laura J. Martins, Vicente Planelles, Martin R. Jakobsen, Beatrice H. Hahn, Ulf Dittmer, Daniel Sauter, and Frank Kirchhoff**

## **Supplemental Figures**

### **IFI16 targets the transcription factor Sp1 to suppress HIV-1 transcription and latency reactivation**

**Dominik Hotter, Matteo Bosso, Kasper L. Jønsson, Christian Krapp, Christina M. Stürzel, Atze Das, Elisabeth Littwitz-Salomon, Ben Berkhout, Alina Russ, Sabine Wittmann, Thomas Gramberg, Yue Zheng, Laura J. Martins, Vicente Planelles, Martin R. Jakobsen, Beatrice H. Hahn, Ulf Dittmer, Daniel Sauter and Frank Kirchhoff**

**Seven supplemental figures**

**Four supplemental tables**

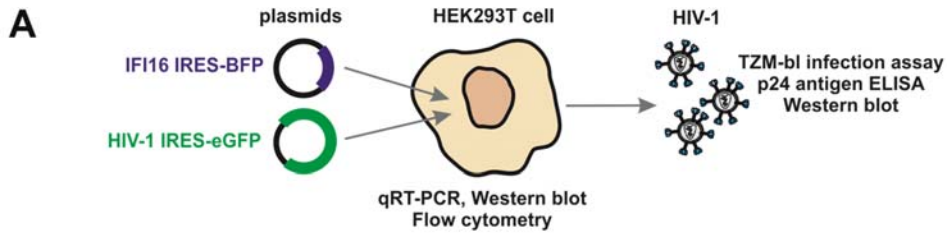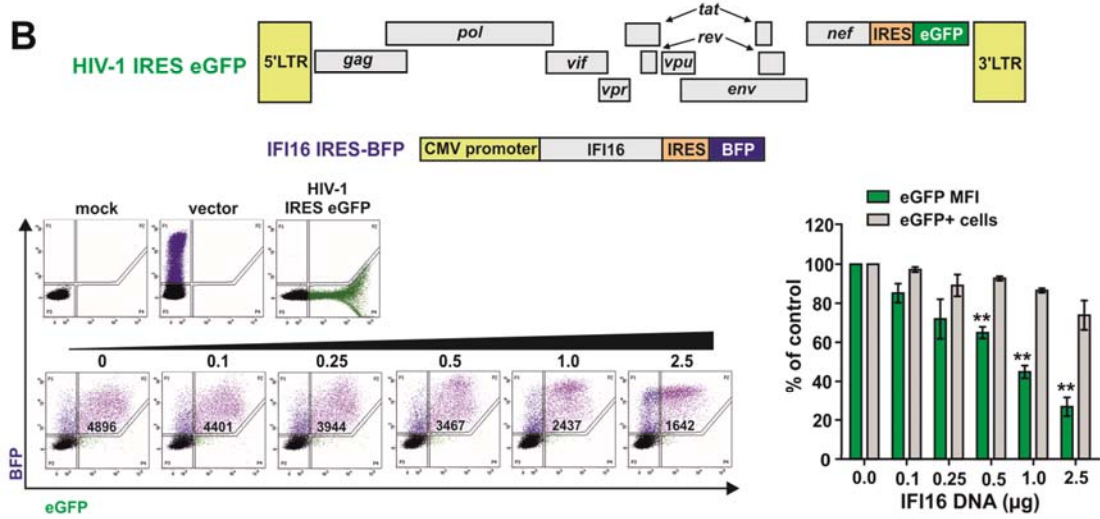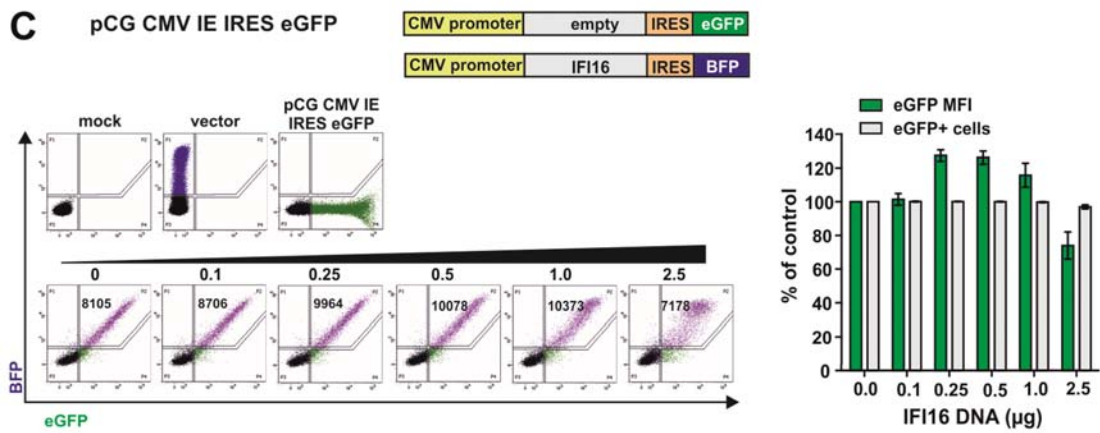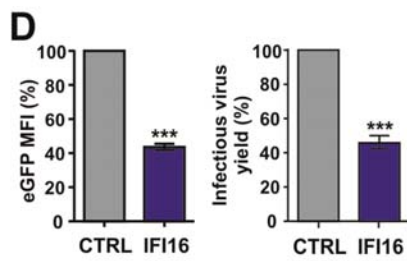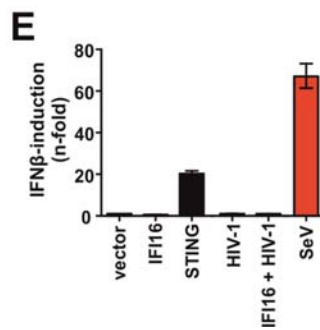

**Figure S1 (related to Figure 1). IFI16 inhibits HIV-1 independently of IFN $\beta$  induction. (A)** Schematic overview on the experimental approach. **(B)** HEK293T cells were cotransfected with an NL4-3 IRES-eGFP construct (2.5  $\mu$ g) (upper panel) and increasing doses of IFI16 IRES-BFP expression vector. Shown are primary FACS data (left) with mean fluorescence intensities (MFI) of eGFP in the eGFP<sup>+</sup>/BFP<sup>+</sup> population and percentages of eGFP<sup>+</sup> cells in BFP<sup>+</sup> populations (right) from three experiments ( $\pm$ SEM) relative to the vector control (100%). **(C)** The experiment was performed as described in panel A, but instead of the proviral construct, a vector expressing eGFP via an IRES under the control of the CMV IE promoter was used. **(D)** HEK293T cells were cotransfected with plasmids expressing CD4, CXCR4 and IFI16 IRES-BFP or a vector control. 18 hours post-transfection, cells were infected with NL4-3 IRES-eGFP. 48 hours later, cells were used for flow cytometry and infectious virus yield was determined by infection of TZM-bl cells. eGFP MFI in the eGFP<sup>+</sup>/BFP<sup>+</sup> population and infectious virus yield relative to the vector control (100%) are shown.  $n = 5 \pm$ SEM. **(E)** HEK293T cells were cotransfected with a firefly luciferase reporter construct under the control of the IFN $\beta$  promoter and expression vectors for the indicated proteins or HIV-1 NL4-3 proviral constructs. A *Gussia* luciferase construct under the control of a constitutively active pTAL promoter was cotransfected for normalization. Cells transfected with the luciferase reporters that were infected with SeV were included as control. 40 h post-transfection luciferase activities were determined. Shown is IFN $\beta$ -induction relative to the vector control measured in triplicate experiments  $\pm$  SD.

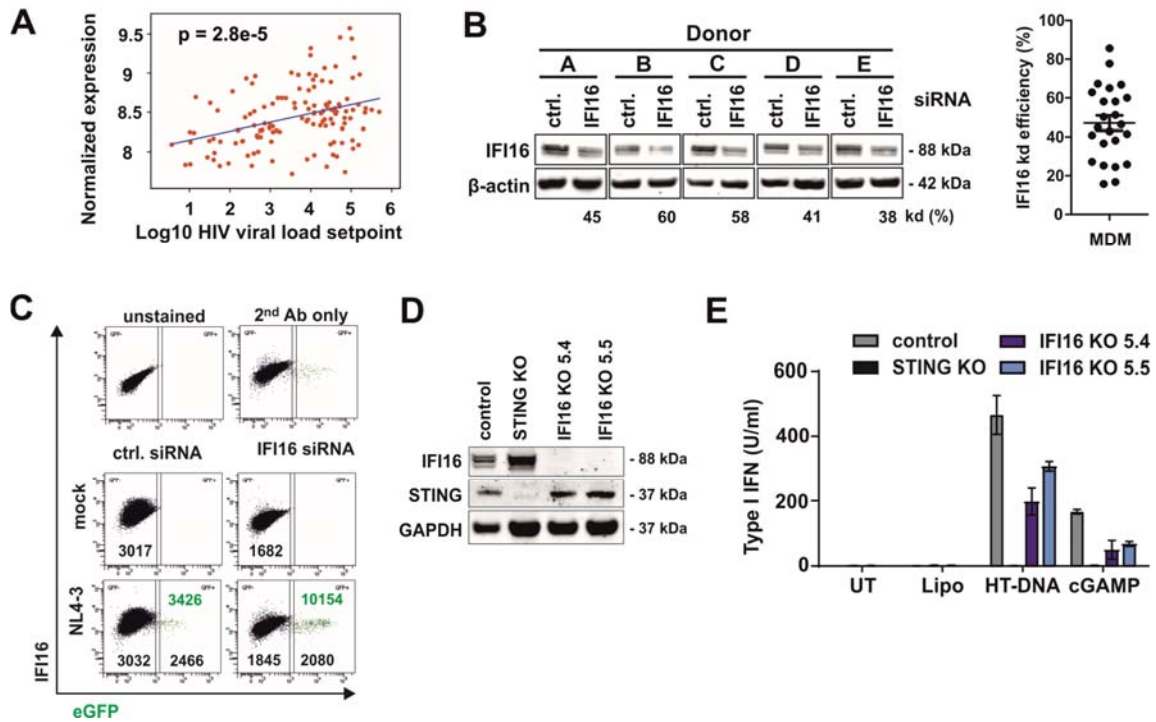

**Figure S2 (related to Figure 2). Expression and silencing of IFI16 *in vitro* and *in vivo*.** (A) Correlation between HIV-1 viral loads and *IFI16* mRNA levels in infected individuals taken from the GuavaH (Genomic Utility for Association and Viral Analyses in HIV) database. (B) Human monocyte-derived macrophages were treated with IFI16-specific or control siRNA and knockdown efficiencies were determined by Western blot analysis. Left panel: Representative Western blot examples. Right panel: Relative IFI16 knockdown efficiencies in all donors analyzed. (C) Human monocyte-derived macrophages were treated with control or IFI16-specific siRNAs before transduction with VSV-G pseudotyped NL4-3 IRES-eGFP. IFI16 and eGFP expression was determined by flow cytometry 3 days post-transduction. Mean fluorescence intensities of IFI16 (black) and eGFP (green) are shown in the representative flow cytometry dot plots for one donor. (D) Western blot analysis of PMA-differentiated parental, IFI16 or STING KO THP-1 cells lines. (E) PMA-differentiated parental, IFI16 or STING KO THP-1 cells were transfected with HT-DNA or cGAMP. 8 h post-transfection, secreted type I IFN was determined in a bioactivity assay using HEKblue cells. Mean values of three transfections  $\pm$  SD are shown.

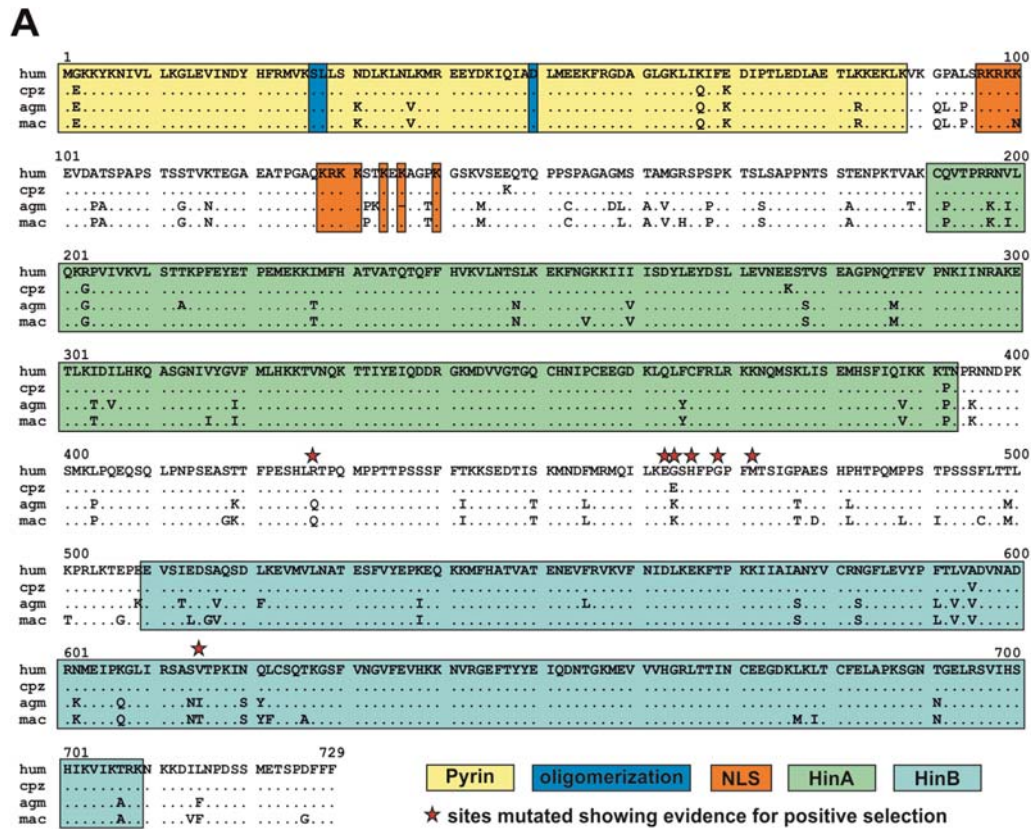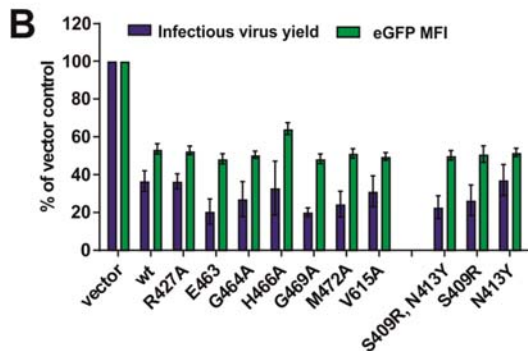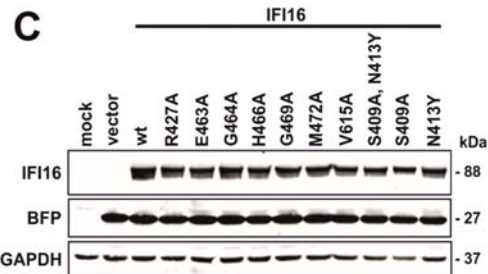

**Figure S3 (related to Figure 3). Localization and functional relevance of sites showing evidence for positive selection in IFI16. (A)** Alignment of IFI16 amino acid sequences from different species. The human (hum) IFI16 sequence is used as reference in the alignment. Points indicate sequence identity between human IFI16 and IFI16 of chimpanzees (cpz), African green monkeys (agm) or rhesus macaques (mac). Functional protein domains and sites showing evidence for positive selection are indicated. **(B)** HEK293T cells were cotransfected with constructs expressing the indicated IFI16 mutants or a vector control coexpressing BFP and proviral HIV-1 NL4-3 IRES-eGFP. 40 h post-transfection, infectious virus yield was determined by infection of TZM-bl cells and cells were analyzed by flow cytometry. Mean fluorescence intensities (MFI;  $\pm$  SEM) of eGFP in the eGFP<sup>+</sup>/BFP<sup>+</sup> population. Results were derived from three independent experiments each performed in triplicate. **(C)** Expression of wt and mutant IFI16 proteins determined by Western blot. BFP serves as control for transfection efficiencies.



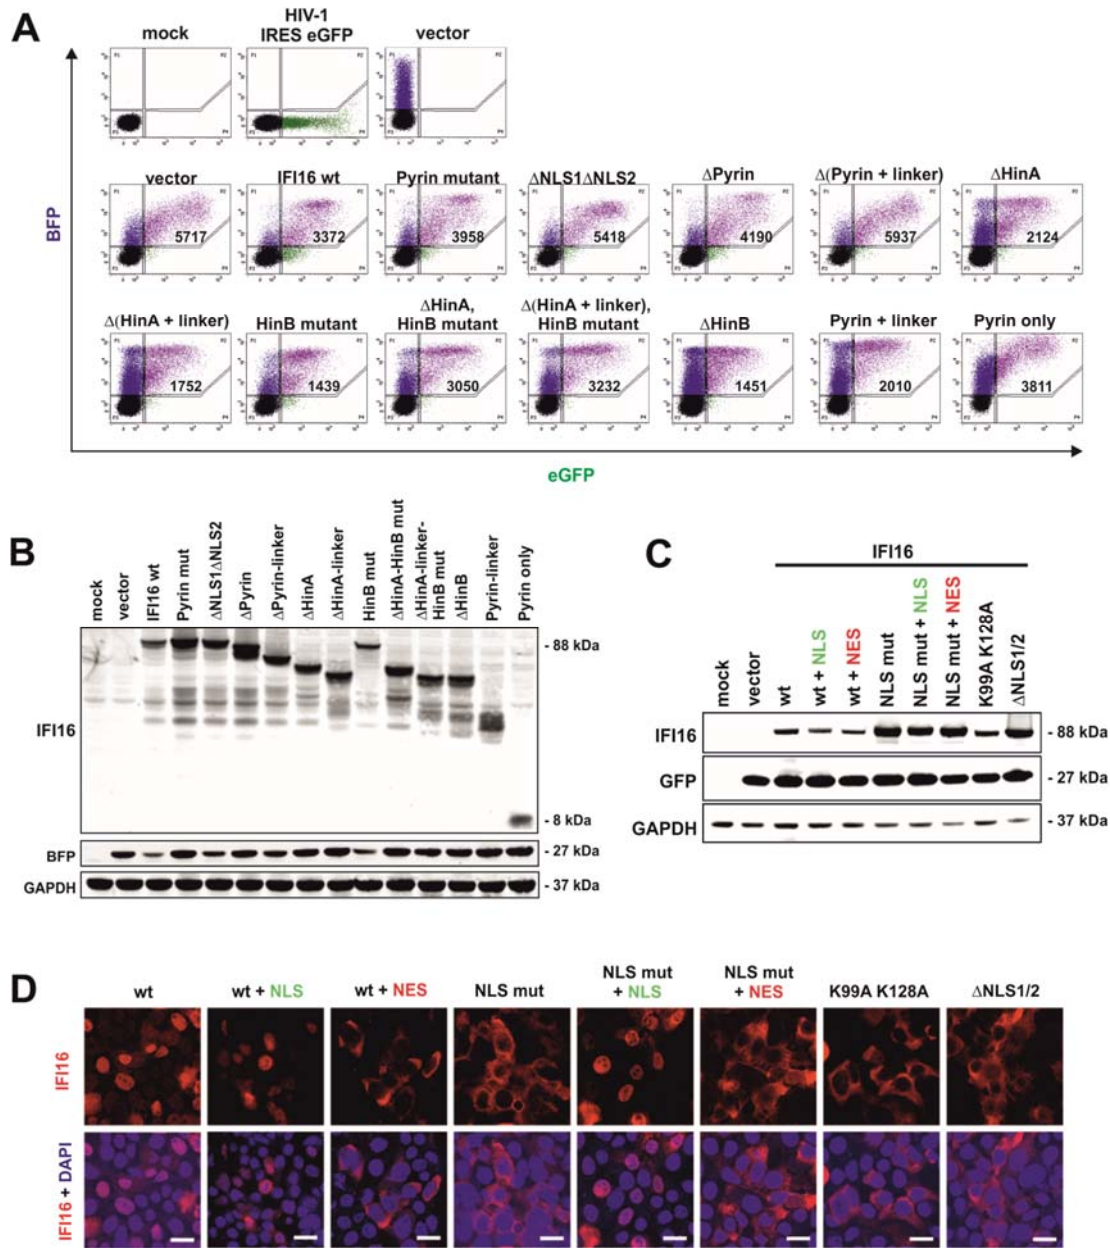

**Figure S4 (related to Figure 4). Function, expression and subcellular localization of mutant forms of IFI16.** (A) HEK293T cells were cotransfected with expression constructs for the indicated IFI16 mutant coexpressing BFP via an IRES (1  $\mu$ g) and proviral constructs for NL4-3 coexpressing eGFP via an IRES (2.5  $\mu$ g). 40 h post-transfection, BFP and eGFP expression was analyzed by flow cytometry. Mean eGFP fluorescence intensities are indicated in the representative flow cytometry dot plots. (B, C) Western blot analysis of HEK293T cells transfected with expression constructs for the indicated IFI16 mutant (1  $\mu$ g). (D) 40 h post-transfection with the indicated IFI16 NLS mutant, HEK293T cells were analyzed by fluorescence microscopy.

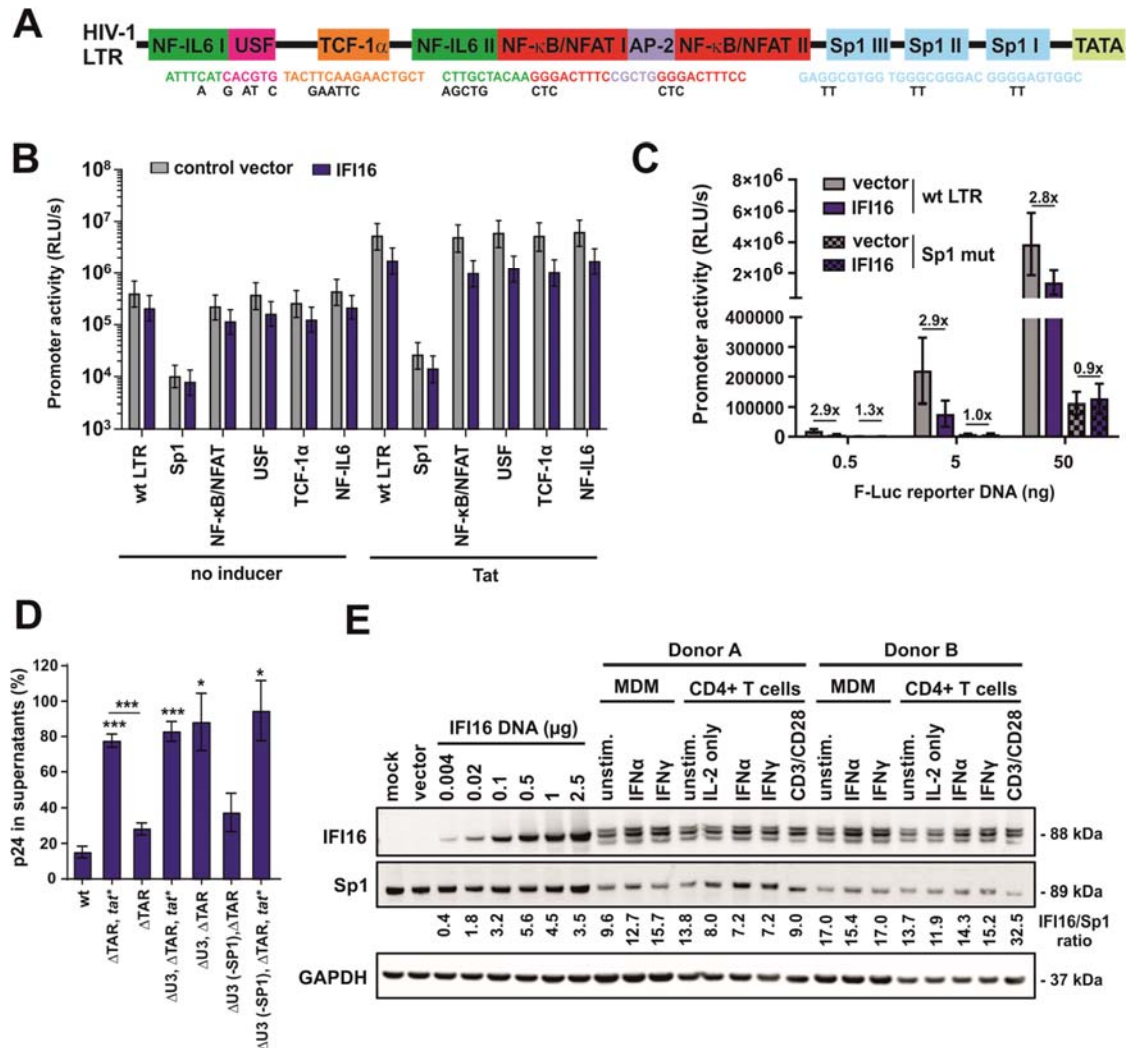

**Figure S5. The antiviral effect of IFI16 depends on Sp1 binding sites (related to Figure 5).** (A) Schematic presentation of binding sites for transcription factors in the HIV-1 LTR and specific mutations analyzed. (B) HEK293T cells were cotransfected with firefly luciferase reporter constructs under the control of the indicated HIV-1 LTR mutant and expression constructs for IFI16 or a vector control. A construct expressing NL4-3 Tat under the control of the CMV IE promoter was cotransfected to activate the LTR. 40 h post-transfection, luciferase activities were determined. Mean values ( $\pm$  SEM) were derived from four independent experiments each performed in triplicate. (C) HEK293T cells were transfected as in (B) using different concentrations of firefly luciferase reporter constructs under the control of the wt LTR or a mutant thereof lacking functional SP1 binding sites.  $n = 3 \pm$  SEM. (D) HEK293T cells were cotransfected with expression constructs for IFI16 and mutant proviral constructs, carrying a doxycycline-responsive LTR promoter (Das et al., 2011). 40 h post-transfection, p24 in the culture supernatants was determined by ELISA. p24 yields relative to those obtained with the vector control (100%) are shown.  $n = 3 \pm$  SEM. \*  $p < 0.05$ , \*\*\*  $p < 0.001$ . (E) Western blot analysis was used to compare IFI16 and Sp1 expression levels in HEK293T cells, transfected with increasing doses of expression constructs for IFI16, with those of monocyte-derived macrophages (MDM) and CD4<sup>+</sup> T cells stimulated for 3 days with IL-2 [10 ng/ml] alone or together with IFN $\alpha$  [500 U/ml], IFN $\gamma$  [200 U/ml] or anti-CD3/CD28 beads.





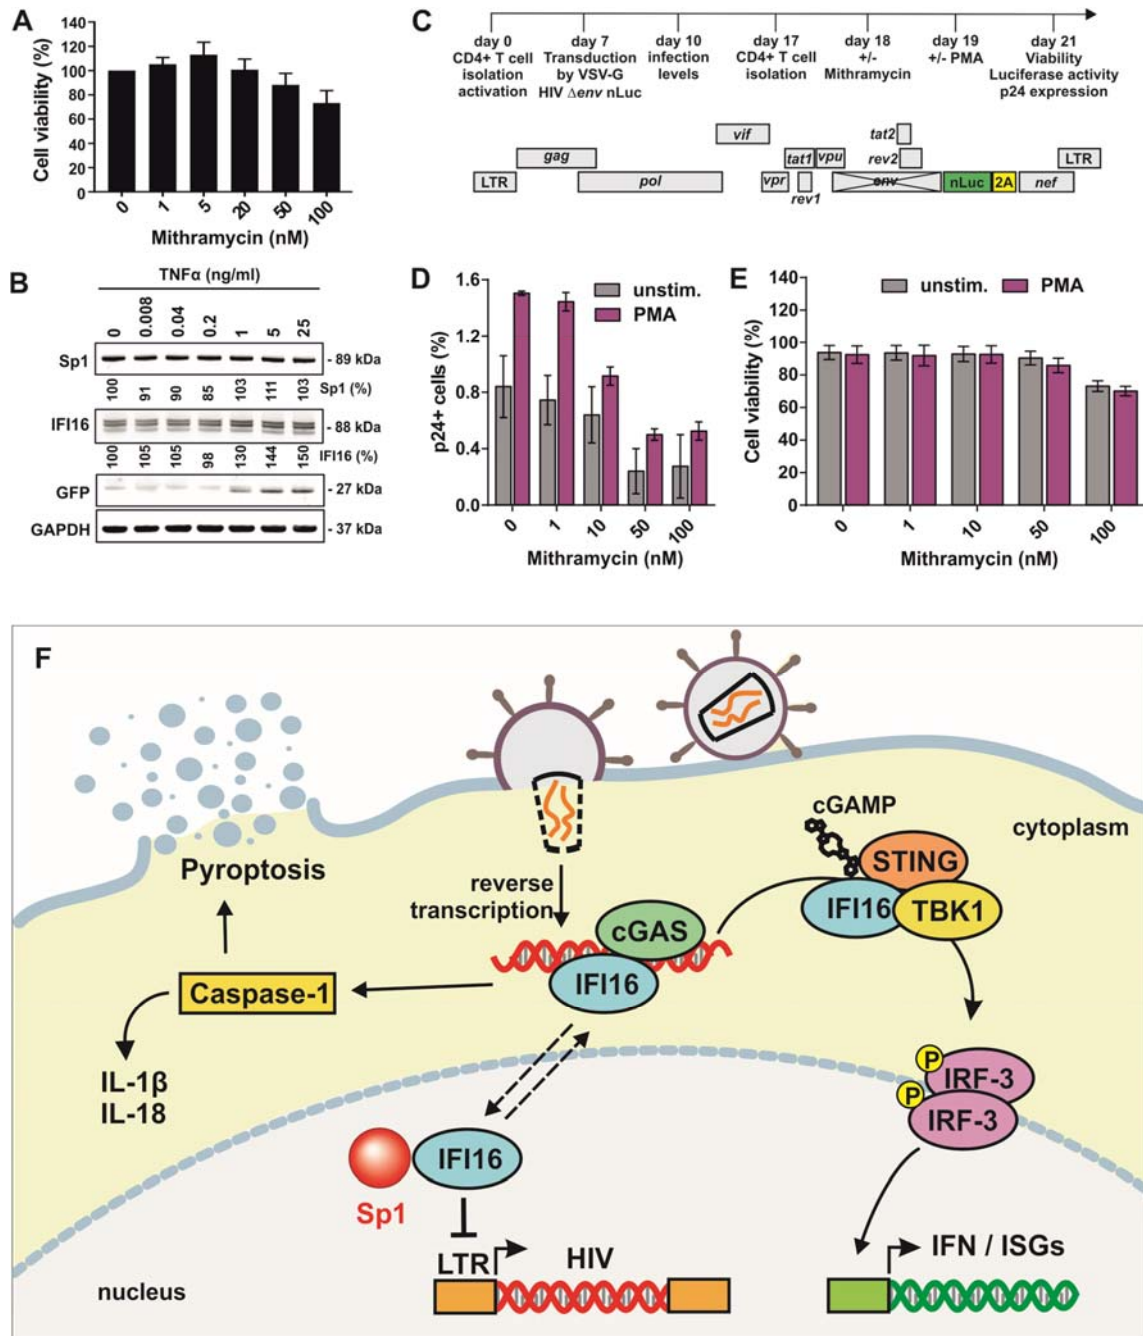

**Figure S7. Role of IFI16 and Sp1 in HIV-1 latency and replication (related to Figure 7).** (A) Two days after stimulation with increasing doses of Mithramycin A, viability of J-Lat 10.6 cells was determined by MTT assay. Shown are mean values ( $\pm$ SEM) derived from three independent experiments. (B) Sp1 and IFI16 expression levels in J-Lat 10.6 cells stimulated for two days with increasing doses of TNF $\alpha$  were determined by Western blot. (C) Genomic organization of the NL4.3-deltaEnv-nLuc-2ANef construct and outline of the experimental approach to analyze the effect of the Sp1 inhibitor Mithramycin on HIV gene expression and reactivation in primary CD4<sup>+</sup> T cells. (D) Frequency of p24<sup>+</sup> T cells and (E) cell viability measured by flow cytometry at day 21. (F) In myeloid cells, IFI16 acts as a cytosolic immune sensor of HIV-1 DNA species (Jakobsen et al., 2013) that promotes IFN induction via the cGAS-STING pathway (Jönsson et al., 2017). In lymphoid CD4<sup>+</sup> T cells abortively infected with HIV-1, IFI16 might sense cytosolic HIV-1 RT intermediates to mediate pyroptotic death in a cGAS-STING-independent manner (Monroe et al., 2014). The present study shows that nuclear IFI16 inhibits HIV-1 gene expression in an Sp1-dependent manner.

## SUPPLEMENTAL TABLES

**Table S1: Primers used to generate pCG IRES BFP expression constructs**

| Construct name          | Primer name                | Primer sequence                                                            |
|-------------------------|----------------------------|----------------------------------------------------------------------------|
| IFI16                   | IFI16 XbaI fw              | CGTCTAGACCATGGGAAAAAATACAAGAA<br>CATTGTTC                                  |
|                         | IFI16 MluI rev             | CTACGCGTTTAGAAGAAAAAGTCTGGTGAAG<br>TTCCATAC                                |
| IFI16 C-HA              | IFI16 C-HA MluI<br>rev     | CTACGCGTTAAGCGTAATCTGGAACATCGTA<br>TGGGTAGAAGAAAAAGTCTGGTGAAGTTTCC         |
| IFI16 R427A             | IFI16 R427A fw             | CCATCTTGCGACTCCTCAGATG                                                     |
|                         | IFI16 R427A rev            | CATCTGAGGAGTCGCAAGATGG                                                     |
| IFI16 E463A             | IFI16 E463A fw             | CTGAAGGCAGGGAGTCATTTTCC                                                    |
|                         | IFI16 E463A rev            | GGAAAATGACTCCCTGCCTTCAG                                                    |
| IFI16 G464A             | IFI16 G464A fw             | CTGAAGGAAGCGAGTCATTTTCC                                                    |
|                         | IFI16 G464A rev            | GGAAAATGACTCGCTTCCTTCAG                                                    |
| IFI16 H466A             | IFI16 H466A fw             | CTGAAGGAAGGGAGTGCTTTTCC                                                    |
|                         | IFI16 H466A rev            | GGAAAAGCACTCCCTTCCTTCAG                                                    |
| IFI16 G469A             | IFI16 G469A fw             | GTCATTTTCCAGCACCGTTCATG                                                    |
|                         | IFI16 G469A rev            | CATGAACGGTGCTGGAAAATGAC                                                    |
| IFI16 M472A             | IFI16 M472A fw             | CGTTCGCGACCAGCATAGG                                                        |
|                         | IFI16 M472A rev            | CCTATGCTGGTCGCGAACG                                                        |
| IFI16 V615A             | IFI16 V615A fw             | GAAGTGCCAGCGCAACTCC                                                        |
|                         | IFI16 V615A rev            | GGAGTTGCGCTGGCACTTC                                                        |
| IFI16 S409A             | IFI16 S409A fw             | CTACCCCAGGAACAGAGACAGCTTC                                                  |
|                         | IFI16 S409A rev            | GAAGCTGTCTCTGTTCCCTGGGGTAG                                                 |
| IFI16 N413Y             | IFI16 N413Y fw             | GCTTCCATACCCTTCAGAGGCC                                                     |
|                         | IFI16 N413Y rev            | GGCCTCTGAAGGGTATGGAAGC                                                     |
| IFI16 ΔNLS1             | IFI16 ΔNLS1 fw             | GCCCTATCAGAAGTGGATGCTACTTCACCTG<br>CAC                                     |
|                         | IFI16 ΔNLS1 rev            | CATCCACTTCTGATAGGGCTGGTCCTTTTAC                                            |
| IFI16 ΔNLS2             | IFI16 ΔNLS2 fw             | GGAGCTCAGTCAACCAAAGAAAAGGCTGGA<br>C                                        |
|                         | IFI16 ΔNLS2 rev            | CTTTGGTTGACTGAGCTCCAGGAGTTGCCTC                                            |
| IFI16 ΔPyrin            | IFI16 ΔPyrin fw            | CGTCTAGACCATGGTAAAAGGACCAGCCCTA<br>TC                                      |
| IFI16 ΔPyrin-<br>linker | IFI16 ΔPyrin-linker<br>fw  | CGTCTAGACCATGCAGGTA ACTCCCAGAAGA<br>AATGTTC                                |
| IFI16 ΔHinA             | IFI16 ΔHinA fw             | GTGGCCAAATGTCAGATACTGAAGGAAGGG<br>AGTCATTTTC                               |
|                         | IFI16 ΔHinA rev            | CTTCAGTATCTGACATTTGGCCACTGTTTTCG<br>G                                      |
| IFI16 ΔHinA-<br>linker  | IFI16 ΔHinA-<br>linker fw  | GGCCAAATGTGAAGTTTCCATAGAAGACAGT<br>G                                       |
|                         | IFI16 ΔHinA-<br>linker rev | CTATGGAAACTTCACATTTGGCCACTGTTTTC                                           |
| IFI16 ΔHinB             | IFI16 ΔHinB rev            | CTACGCGTTAAGCGTAATCTGGAACATCGTA<br>TGGGTAGTTTGT TTTTCTTTATCTGG             |
| IFI16 Pyrin-linker      | IFI16 Pyrin-linker<br>rev  | CTACGCGTTAAGCGTAATCTGGAACATCGTA<br>TGGGTAACATTTGGCCACTGTTTTTC              |
| IFI16 Pyrin-only        | IFI16 Pyrin-only<br>rev    | CTACGCGTTAAGCGTAATCTGGAACATCGTA<br>TGGGTATTTTAACTTTTCTTTTAAAGAGTTT<br>CAGC |

|                    |                         |                                                                            |
|--------------------|-------------------------|----------------------------------------------------------------------------|
| IFI16 + SV40 NLS   | IFI16 + SV40 NLS rev    | ATCACGCGTTTACACCTTCCGCTTCTTCTTCG<br>GGAAGAAAAAGTCTGGTGAAGTTTCC             |
| IFI16 + Rev NES    | IFI16 + Rev NES rev     | ATCACGCGTTTAAAGAGTAAGTCTCTCAAGC<br>GGTGGTAGGAAGAAAAAGTCTGGTGAAGTTT<br>CC   |
| IFI16 NLS1 mut     | IFI16 NLS1 mut fw       | ATCAGCCGCTGCCGCCGCTGAAGTGGATGCT<br>ACTTCACCTG                              |
|                    | IFI16 NLS1 mut rev      | CTTCAGCGGCGGCAGCGGCTGATAGGGCTGG<br>TCCTTTTAC                               |
| IFI16 NLS2/3/4 mut | IFI16 NLS2/3/4 mut fw   | ACCGCCGAAGCTGCTGGACCCGCCGGGAGTG<br>CCGTGTCCGAGGAACAGACTCAG                 |
|                    | IFI16 NLS2/3/4 mut rev  | GGGTCCAGCAGCTTCGGCGGTTGATGCAGCG<br>GCTGCCTGAGCTCCAGGAGTTGCC                |
| IFI16 K99A         | IFI16 K99A fw           | CAAGAAAGAGGGCGAAGGAAGTG                                                    |
|                    | IFI16 K99A rev          | CACTTCCTTCGCCCTCTTTCTTG                                                    |
| IFI16 K128A        | IFI16 K128A fw          | GAGCTCAGGCAAGAAAAAATCAACCAAAG                                              |
|                    | IFI16 K128A rev         | CTTTGGTTGATTTTTTTCTTGCCTGAGCTC                                             |
| cpz IFI16 C-HA     | cpz IFI16 XbaI fw       | CTTCTAGACCATGGAAAAAATACAAGAAC<br>ATTGTTCTACTG                              |
|                    | cpz IFI16 C-HA MluI rev | CTACGCGTTAAGCGTAATCTGGAACATCGTA<br>TGGGTAGAAGAAAAAGTCTGGTGAAGTTTCC<br>ATAC |
| agm IFI16 C-HA     | agm IFI16 XbaI fw       | CTTCTAGACCATGGAAAAAATACAAGAAC<br>ATTGTTCTACTG                              |
|                    | agm IFI16 C-HA MluI rev | CTACGCGTTAAGCGTAATCTGGAACATCGTA<br>TGGGTAGAAGAAAAAGTCTGGTGAAGTTTCC<br>ATAC |
| mac IFI16 C-HA     | mac IFI16 XbaI fw       | CTTCTAGACCATGGAAAAAATACAAGAAC<br>ATTGTTCTACTG                              |
|                    | mac IFI16 C-HA MluI rev | CTACGCGTTAAGCGTAATCTGGAACATCGTA<br>TGGGTAGAAGAAAAAGCCTGGTGAAGTTTCC<br>ATAC |
| p204 C-HA          | p204 XbaI fw            | CGTCTAGACCATGGTGAATGAATACAAGAG                                             |
|                    | p204 C-HA MluI rev      | CTACGCGTTAAGCGTAATCTGGAACATCGTA<br>TGGGTACTTTCTAGCATTGATGACC               |
| AIM2 C-HA          | AIM2 XbaI fw            | CGTCTAGACCATGGAGAGTAAATACAAGG                                              |
|                    | AIM2 C-HA MluI rev      | CTACGCGTTAAGCGTAATCTGGAACATCGTA<br>TGGGTATGTTTTTTTTTGGCCTTAATAAC           |
| STING              | STING XbaI fw           | CGTCTAGACCATGCCCCACTCCAGC                                                  |
|                    | STING MluI rev          | CTACGCGTTCAAGAGAAATCCGTGCG                                                 |
| Sp1 C-HA           | Sp1 XbaI fw             | CATCTAGACCATGAGCGACCAAGATCACTCC<br>ATG                                     |
|                    | Sp1 C-HA MluI rev       | CGAACGCGTTCAAGCGTAATCTGGAACATCG<br>TATGGGTAGAAGCCATTGCCACTGATATTA<br>TGGAC |

**Table S2: Primers used to generate HIV-1 LTR F-Luc reporter constructs**

| Construct name  | Primer name        | Primer sequence                              |
|-----------------|--------------------|----------------------------------------------|
| HIV-1 LTR F-luc | HIV-1 LTR MluI fw  | CGTCTAGACCATGGGAAAAAATACAAGA<br>ACATTGTTC    |
|                 | HIV-1 LTR XhoI rev | CTACGCGTTTAGAAGAAAAAGTCTGGTGA<br>AGTTTCCATAC |

**Table S3: Primers used to generate chimeric HIV-1 proviral constructs**

| Construct name                | Primer name                   | Primer sequence                                            |
|-------------------------------|-------------------------------|------------------------------------------------------------|
| CH058<br>with LTRs<br>of THRO | THRO NotI 5'LTR_for           | GCATGCTCGAGCGGCCCGCCAGTGTGATG                              |
|                               | THRO_5'LTR in<br>CH058 OE rev | CTCTAGCAGTGGCGCCCGAACAGGGACCTG                             |
|                               | THRO_5'LTR in<br>CH058 OE fw  | GTCAGTGTGGAAAATCTCTAGCAGTGGCGC<br>CCG                      |
|                               | CH058_BstZ17I_5'LTR_rev       | GATGAAGACTTCAGGAAGTATACGCCGAAT<br>TGGGCCCTCTAGATGCATGCTCGA |
|                               | CH058 StuI 3'LTR_fw           | CGAGGCCTGTCCAAAGGTATCTTTTCAGC                              |
|                               | THRO_3'LTR in<br>CH058 OE rev | GGACTGGAAGGGCTAACTTACTCCCAAAG<br>AG                        |
|                               | THRO_3'LTR in<br>CH058 OE fw  | GATCTTAGCCACTTTTTAAAAGAAAAGGGG<br>GGACTGGAAGG              |
|                               | THRO_MluI_3'LTR_rev           | GCTTGATGCATAGCTTGAGTATTCTAACGCG<br>TCAC                    |
| CH040<br>with LTRs<br>of THRO | THRO NotI 5'LTR_fw            | GCATGCTCGAGCGGCCCGCCAGTGTGATG                              |
|                               | THRO_5'LTR in<br>CH040 OE rev | CTCTAGCAGTGGCGCCCGAACAGGGACTTG                             |
|                               | THRO_5'LTR in<br>CH040 OE fw  | GTCAGTGTGGAAAATCTCTAGCAGTGGCGC<br>CCG                      |
|                               | CH040 AgeI 5'LTR_rev          | GAGACTATGTAGACCGGTGC                                       |
|                               | CH040 BlnI 3'LTR_fw           | CGGCTGAGCCAGCAGCAGAG                                       |
|                               | THRO_3'LTR in<br>CH040 OE rev | GGACTGGAAGGGCTAACTTACTCCCAAAG<br>AG                        |
|                               | THRO_3'LTR in<br>CH040 OE fw  | GATCTTAGCCACTTTTTAAAAGAAAAGGGG<br>GGACTGGAAGG              |
|                               | THRO_MluI_3'LTR_rev           | GCTTGATGCATAGCTTGAGTATTCTAACGCG<br>TCAC                    |
| THRO with<br>LTRs of<br>CH058 | CH058 NotI 5'LTR_fw           | CTAGATGCATGCTCGAGCGGCCGCTGGAAG                             |
|                               | CH058_5'LTR in<br>THRO OE rev | CTCTAGCAGTGGCGCCCGAACAGGGACC                               |
|                               | CH058_5'LTR in<br>THRO OE fw  | CAGTGTGGAAAATCTCTAGCAGTGGCGCC<br>GAAC                      |
|                               | CH042_HpaI_5'LTR_rev          | GCCCACACTAATGATGTAAAACAGTTAACA<br>GAGGCAGTGC               |
|                               | THRO BbvCI 3'LTR_fw           | GCTATAGCAGTAGCTGAGGGGACAGATAG                              |
|                               | CH058_3'LTR in<br>THRO OE rev | GGGGACTGGAAGGGCTAATCACTCCCAGA<br>AAAGAC                    |
|                               | CH058_3'LTR in<br>THRO OE fw  | GCCACTTTTTAAAAGAAAAGGGGGGACTGG<br>AAGGGC                   |
|                               | CH058_MluI_3'LTR_rev          | GATGCATAGCTTGAGTATTCTAACGCGTCAC                            |

**Table S4: Primers and fluorescent probes used for qRT-PCR**

| <b>Viral transcript</b> | <b>Primer/probe name</b>       | <b>Primer/probe sequence</b>        |
|-------------------------|--------------------------------|-------------------------------------|
| R-U5/ <i>gag</i>        | R-U5/ <i>gag</i> for           | GCCTCAATAAAGCTTGCCTTGA              |
|                         | R-U5/ <i>gag</i> rev           | GGGCGCCACTGCTAGAGA                  |
|                         | R-U5/ <i>gag</i> probe FAM/BBQ | 6FAM-CAGAGTCACACAACAGACGGGCACA-BBQ  |
| <i>nef</i>              | <i>nef</i> for                 | GGTGGGAGCAGYATCTCGAGA               |
|                         | <i>nef</i> rev                 | TGTAAGTCATTGGTCTTAAAGGTACCTGAGG     |
|                         | <i>nef</i> probe FAM/BBQ       | 6FAM-GCTTCYAGCCAGGCACAACAGCATT-BBQ  |
| U3-polyA                | U3-polyA for                   | GCCCTCAGATGCTRCATATAA               |
|                         | U3-polyA rev                   | TTTTTTTTTTTTTTTTTTTTTTTTTTTGAAG     |
|                         | U3-polyA FAM/BBQ               | 6FAM-TGCCTGTACTGGGTCTCTCTGGTTAG-BBQ |
