# Supplementary material
Source: PubMed Central journal article supplement (PMC6681451)
Supplement: NIHMS1529562-supplement-2.pdf [file NIHMS1529562-supplement-2.pdf]

## SUPPLEMENTAL REFERENCES

- Baalwa, J., Wang, S., Parrish, N.F., Decker, J.M., Keele, B.F., Learn, G.H., Yue, L., Ruzagira, E., Ssemwanga, D., Kamali, A., et al. (2013). Molecular identification, cloning and characterization of transmitted/founder HIV-1 subtype A, D and A/D infectious molecular clones. *Virology* 436, 33–48.
- Bibollet-Ruche, F., Heigele, A., Keele, B.F., Easlick, J.L., Decker, J.M., Takehisa, J., Learn, G., Sharp, P.M., Hahn, B.H., and Kirchhoff, F. (2012). Efficient SIVcpz replication in human lymphoid tissue requires viral matrix protein adaptation. *J. Clin. Invest.* 122, 1644–1652.
- Bodelle, P., Vallari, A., Coffey, R., McArthur, C.P., Beyeme, M., Devare, S.G., Schochetman, G., and Brennan, C.A. (2004). Identification and Genomic Sequence of an HIV Type 1 Group N Isolate from Cameroon. *AIDS Res. Hum. Retroviruses* 20, 902–908.
- Bosque, A., and Planelles, V. (2009). Induction of HIV-1 latency and reactivation in primary memory CD4+ T cells. *Blood* 113, 58–65.
- Carette, J.E., Raaben, M., Wong, A.C., Herbert, A.S., Obernosterer, G., Mulherkar, N., Kuehne, A.I., Kranzusch, P.J., Griffin, A.M., Ruthel, G., et al. (2011). Ebola virus entry requires the cholesterol transporter Niemann–Pick C1. *Nature* 477, 340–343.
- Das, A.T., Harwig, A., and Berkhout, B. (2011). The HIV-1 Tat Protein Has a Versatile Role in Activating Viral Transcription  $\nabla$ . *J. Virol.* 85, 9506–9516.
- DuBridg, R.B., Tang, P., Hsia, H.C., Leong, P.M., Miller, J.H., and Calos, M.P. (1987). Analysis of mutation in human cells by using an Epstein-Barr virus shuttle system. *Mol. Cell. Biol.* 7, 379–387.
- Fenton-May, A.E., Dibben, O., Emmerich, T., Ding, H., Pfafferott, K., Aasa-Chapman, M.M., Pellegrino, P., Williams, I., Cohen, M.S., Gao, F., et al. (2013). Relative resistance of HIV-1 founder viruses to control by interferon-alpha. *Retrovirology* 10, 146.
- Fouchier, R.A., Meyer, B.E., Simon, J.H., Fischer, U., and Malim, M.H. (1997). HIV-1 infection of non-dividing cells: evidence that the amino-terminal basic region of the viral matrix protein is important for Gag processing but not for post-entry nuclear import. *EMBO J.* 16, 4531–4539.
- Freel, S.A., Picking, R.A., Ferrari, G., Ding, H., Ochsenbauer, C., Kappes, J.C., Kirchherr, J.L., Soderberg, K.A., Weinhold, K.J., Cunningham, C.K., et al. (2012). Initial HIV-1 Antigen-Specific CD8+ T Cells in Acute HIV-1 Infection Inhibit Transmitted/Founder Virus Replication. *J. Virol.* 86, 6835–6846.
- Gao, F., Searce, R.M., Alam, S.M., Hora, B., Xia, S., Hohm, J.E., Parks, R.J., Ogburn, D.F., Tomaras, G.D., Park, E., et al. (2009). Cross-reactive monoclonal antibodies to multiple HIV-1 subtype and SIVcpz envelope glycoproteins. *Virology* 394, 91–98.
- Gnanadurai, C.W., Pandrea, I., Parrish, N.F., Kraus, M.H., Learn, G.H., Salazar, M.G., Sauerma, U., Töpfer, K., Gautam, R., Münch, J., et al. (2010). Genetic Identity and Biological Phenotype of a Transmitted/Founder Virus Representative of Nonpathogenic Simian Immunodeficiency Virus Infection in African Green Monkeys. *J. Virol.* 84, 12245–12254.
- Hotter, D., Kirchhoff, F., and Sauter, D. (2013). HIV-1 Vpu does not degrade interferon regulatory factor 3. *J. Virol.* 87, 7160–7165.
- Jin, T., Perry, A., Jiang, J., Smith, P., Curry, J.A., Unterholzner, L., Jiang, Z., Horvath, G., Rathinam, V., Johnstone, R.W., et al. (2012). Structures of The HIN Domain:DNA Complexes Reveal Ligand Binding and Activation Mechanisms of The AIM2 Inflammasome and IFI16 Receptor. *Immunity* 36, 561–571.

- Jønsson, K.L., Laustsen, A., Krapp, C., Skipper, K.A., Thavachelvam, K., Hotter, D., Egedal, J.H., Kjolby, M., Mohammadi, P., Prabakaran, T., et al. (2017). IFI16 is required for DNA sensing in human macrophages by promoting production and function of cGAMP. *Nat. Commun.* 8, 14391.
- Jordan, A., Bisgrove, D., and Verdin, E. (2003). HIV reproducibly establishes a latent infection after acute infection of T cells in vitro. *EMBO J.* 22(8), 1868-1877.
- Keele, B.F., Van Heuverswyn, F., Li, Y., Bailes, E., Takehisa, J., Santiago, M.L., Bibollet-Ruche, F., Chen, Y., Wain, L.V., Liegeois, F., et al. (2006). Chimpanzee Reservoirs of Pandemic and Nonpandemic HIV-1. *Science* 313, 523–526.
- Konvalinka, J., Litterst, M.A., Welker, R., Kottler, H., Rippmann, F., Heuser, A.M., and Kräusslich, H.G. (1995). An active-site mutation in the human immunodeficiency virus type 1 proteinase (PR) causes reduced PR activity and loss of PR-mediated cytotoxicity without apparent effect on virus maturation and infectivity. *J. Virol.* 69, 7180–7186.
- Kumar, P., Hui, H.X., Kappes, J.C., Haggarty, B.S., Hoxie, J.A., Arya, S.K., Shaw, G.M., and Hahn, B.H. (1990). Molecular characterization of an attenuated human immunodeficiency virus type 2 isolate. *J. Virol.* 64, 890–901.
- Mack, K., Starz, K., Sauter, D., Langer, S., Bibollet-Ruche, F., Learn, G.H., Stürzel, C.M., Leoz, M., Plantier, J.-C., Geyer, M., et al. (2017). Efficient Vpu-Mediated Tetherin Antagonism by an HIV-1 Group O Strain. *J. Virol.* 91, e02177-16.
- Martins, L.J., Bonczkowski, P., Spivak, A.M., De Spiegelaere, W., Novis, C.L., DePaula-Silva, A.B., Malatinkova, E., Trypsteen, W., Bosque, A., Vanderkerckhove, L., and Planelles, V. (2016). Modeling HIV-1 Latency in Primary T Cells Using a Replication-Competent Virus. *AIDS Res Hum Retroviruses.* 32, 187-193.
- Mason, R.D., Welles, H.C., Adams, C., Chakrabarti, B.K., Gorman, J., Zhou, T., Nguyen, R., O’Dell, S., Lusvardi, S., Bewley, C.A., et al. (2016). Targeted Isolation of Antibodies Directed against Major Sites of SIV Env Vulnerability. *PLoS Pathog.* 12.
- Morrone, S.R., Wang, T., Constantoulakis, L.M., Hooy, R.M., Delannoy, M.J., and Sohn, J. (2014). Cooperative assembly of IFI16 filaments on dsDNA provides insights into host defense strategy. *Proc. Natl. Acad. Sci. U. S. A.* 111, E62-71.
- Morton, E.L., Forst, C.F., Zheng, Y., DePaula-Silva, A.B., Ramirez, G.P., Planelles, V., and D’Orso, I. (2019). Transcriptional Circuit Fragility Influences HIV Proviral Fate. *Cell Reports* (in press).
- Ochsenbauer, C., Edmonds, T.G., Ding, H., Keele, B.F., Decker, J., Salazar, M.G., Salazar-Gonzalez, J.F., Shattock, R., Haynes, B.F., Shaw, G.M., et al. (2012). Generation of transmitted/founder HIV-1 infectious molecular clones and characterization of their replication capacity in CD4 T lymphocytes and monocyte-derived macrophages. *J. Virol.* 86, 2715–2728.
- Ostertag, E.M., Prak, E.T., DeBerardinis, R.J., Moran, J.V., and Kazazian, H.H., Jr. (2000). Determination of L1 retrotransposition kinetics in cultured cells. *Nucleic Acids Res.* 28, 1418-1423.
- Parrish, N.F., Gao, F., Li, H., Giorgi, E.E., Barbian, H.J., Parrish, E.H., Zajic, L., Iyer, S.S., Decker, J.M., Kumar, A., et al. (2013). Phenotypic properties of transmitted founder HIV-1. *Proc. Natl. Acad. Sci. U. S. A.* 110, 6626–6633.
- Plantier, J.-C., Leoz, M., Dickerson, J.E., Oliveira, F.D., Cordonnier, F., Lemée, V., Damond, F., Robertson, D.L., and Simon, F. (2009). A new human immunodeficiency virus derived from gorillas. *Nat. Med.* 15, 871–872.

Platt, E.J., Wehrly, K., Kuhmann, S.E., Chesebro, B., and Kabat, D. (1998). Effects of CCR5 and CD4 Cell Surface Concentrations on Infections by Macrophagetropic Isolates of Human Immunodeficiency Virus Type 1. *J. Virol.* 72, 2855–2864.

Salazar-Gonzalez, J.F., Salazar, M.G., Keele, B.F., Learn, G.H., Giorgi, E.E., Li, H., Decker, J.M., Wang, S., Baalwa, J., Kraus, M.H., et al. (2009). Genetic identity, biological phenotype, and evolutionary pathways of transmitted/founder viruses in acute and early HIV-1 infection. *J. Exp. Med.* 206, 1273–1289.

Stewart, S.A., Dykxhoorn, D.M., Palliser, D., Mizuno, H., Yu, E.Y., An, D.S., Sabatini, D.M., Chen, I.S., Hahn, W.C., Sharp, P.A., et al. (2003). Lentivirus-delivered stable gene silencing by RNAi in primary cells. *RNA* 9, 493-501.

Talbott, R., Kraus, G., Looney, D., and Wong-Staal, F. (1993). Mapping the determinants of human immunodeficiency virus 2 for infectivity, replication efficiency, and cytopathicity. *Proc. Natl. Acad. Sci. U. S. A.* 90, 4226–4230.

Tebit, D.M., Zekeng, L., Kaptué, L., Gürtler, L., Fackler, O.T., Keppler, O.T., Herchenröder, O., and Kräusslich, H.-G. (2004). Construction and characterization of an HIV-1 group O infectious molecular clone and analysis of vpr- and nef-negative derivatives. *Virology* 326, 329–339.

Turrini, F., Marelli, S., Kajaste-Rudnitski, A., Lusic, M., Van Lint, C., Das, A.T., Harwig, A., Berkhout, B., and Vicenzi, E. (2015). HIV-1 transcriptional silencing caused by TRIM22 inhibition of Sp1 binding to the viral promoter. *Retrovirology* 12, 104.

Uzé, G., Di Marco, S., Mouchel-Vielh, E., Monneron, D., Bandu, M.T., Horisberger, M.A., Dorques, A., Lutfalla, G., and Mogensen, K.E. (1994). Domains of interaction between alpha interferon and its receptor components. *J. Mol. Biol.* 243, 245–257.

Verrier, J.D., Madorsky, I., Coggin, W.E., Geesey, M., Hochman, M., Walling, E., Daroszewski, D., Eccles, K.S., Ludlow, R., and Semple-Rowland, S.L. (2011). Bicistronic lentiviruses containing a viral 2A cleavage sequence reliably co-express two proteins and restore vision to an animal model of LCA1. *PLoS One* 6, e20553

Yu, F., Zingler, N., Schumann, G., and Strätling, W.H. (2001). Methyl-CpG-binding protein 2 represses LINE-1 expression and retrotransposition but not Alu transcription. *Nucleic Acids Res* 29, 4493-4501.

Yukl, S.A., Kaiser, P., Kim, P., Telwatte, S., Joshi, S.K., Vu, M., Lampiris, H., and Wong, J.K. (2018). HIV latency in isolated patient CD4+ T cells may be due to blocks in HIV transcriptional elongation, completion, and splicing. *Sci. Transl. Med.* 10.

Zimmerman, E.S., Sherman, M.P., Blackett, J.L., Neidleman, J.A., Kreis, C., Mundt, P., Williams, S.A., Warmerdam, M., Kahn, J., Hecht, F.M., et al. (2006). Human Immunodeficiency Virus Type 1 Vpr Induces DNA Replication Stress In Vitro and In Vivo. *J. Virol.* 80, 10407–10418.
